# Supplementary material for: piRNA-mediated transgenerational inheritance of an acquired trait
Source: HighWire-hosted journal article supplement (doi:10.1101/gr.136614.111), 2012-05-03
Supplement: SuppMethodsLegends.docx [file SuppMethodsLegends.docx]

**SUPPLEMENTAL FIGURE LEGENDS**

**Supplemental Table S1. Total piRNA counts for each of the 85 most highly targeted *Drosophila* transposable elements** **in isogenic libraries from 3 day-old flies with young or aged ancestors.**

(Up to 4 mismatches allowed between reads and RepBase sequence. Reads mapping to multiple TEs were not considered.)

**Supplemental Table S2. The genomic loci analysed in Figure 5contain defective copies from many different transposable elements.**

(div: percentage of divergence with RepBase consensus sequence)

**Supplemental Figure S1. Library annotation.**

**(A)** Sequencing counts for all generated libraries. “Mappers” correspond to reads perfectly mapping to the sequenced genome of *Drosophila melanogaster*. “*bonafide* reads” correspond to genome-mapping reads after subtracting reads matching abundant cellular species such as rRNAs, tRNAs or snRNAs. “piRNAs” are defined as *bonafide* reads strictly exceeding 22 nt in length and not annotated as miRNAs. **(B)** Pie charts summarizing the annotation of genome-mapping reads. **(C)** Barplots displaying the length distributions of *bonafide* reads.

**Supplemental Figure S2. Normalization of small RNA libraries.**

Comparison of ovarian TE piRNA distributions (left panels) and *I-element* piRNA levels (right panels) between RL3d and RH3d libraries using four different normalization factors: **(A)** Library counts were normalized to one million *bonafide* reads (genome-mapping reads after subtracting reads matching abundant cellular species such as rRNAs, tRNAs or snRNAs) **(B)** Library counts were normalized to one million piRNAs **(C)** Library counts were normalized to one million miRNAs **(D)** Library counts were normalized to one million non TE-derived endo-siRNAs (derived from the hairpins of structured loci and the 3’UTR of other loci)

**Supplemental Figure S3.** **High amount of antisense and sense *I-element* piRNAs accumulate in the ovaries of SFH3d flies.**

**(A)** Density profiles of piRNAs matching the *I-element* sequence (up to 4 mismatches) in 3 day-old SF ovaries when they are split into sense (red) and antisense piRNAs (blue). **(B)** Normalized counts of *I-element* piRNAs in SFL3d and SFH3d ovarieswhen they are split into piRNAs that perfectly match the functional *I-element* sequence (black) and others (white). **(C)** The total reads of *I-element* piRNAs from previously published libraries (Brennecke et al. 2008) of R, SF, RSF and I ovaries were normalized as in Fig. 2B and E and the corresponding ping-pong signatures calculated as in Fig. 2C and F.

**Supplemental Figure S4. Ancestor aging does not affect the level of PIWI proteins.**

Western blot (left) was performed on total ovarian protein lysates from 3 day-old RL3d and RH3d flies (with young or aged ancestors respectively) using antibodies against Piwi, Aub and Ago3 and a-Tubulin (Tub) as loading control. Quantification on biological replicates (right) indicates no significant signal variation of the three protein levels in RH3d (grey bars)compared toRL3d (white bars) (bars represent the changes of protein level ± s.d.; two-tailed Student’s *t-*test *P* value >0.05, n=3).

**Supplemental Figure S5. Specific increase of *I-element* piRNAs with ping-pong partners in the ovaries of RH3d flies.**

**(A)** Density profiles of piRNAs matching the *I-element* sequence (up to 4 mismatches) in 3 day-old R ovaries when they are split into sense (red) and antisense piRNAs (blue). **(B)** Normalized counts of *I-element* piRNAs in RL3d and RH3d ovaries when they are split into piRNAs with sequenced ping-pong partners (green) and the others (blue). **(C)** Histograms displaying the nucleotide bias for adenosine at position 10 (hatched) and uridine at position 1 (filled) in sense and antisense *I-element* piRNAs from RH3d ovaries split into piRNAs with sequenced ping-pong partners (green) and the others (blue). **(D)** Pie chart displays the amount of *I-element* ping-pong piRNAs that map uniquely to the genome in RH3d ovaries when they are split into *trans* ping-pong piRNAs, the genome-unique partners of which map exclusively to other genomic loci (white) and others (*cis* and/or *trans* ping-pong piRNAs (black)). **(E)** Density of genome-unique *I-element* piRNAs when they are split into piRNAs mapping to *I-element* copies located in the *42AB* piRNA cluster (orange) and piRNAs mapping to defective *I-elements* in other genomic loci (black).

**Supplemental Figure S6. Most of the *I-element* defective fragments produce sense and/or antisense ping-pong piRNAs in the offspring of aged ancestors.**

Eachhorizontal bar indicates one of the *I-element* defective fragments annotated in the Release 5 genome sequence that were aligned to the functional *I-element* sequence and sorted by chromosomal positions (the *I-element* fragments located in the *42AB* cluster are in orange). Bar diagrams indicate the normalized amount of piRNAs with ping-pong partners uniquely mapping to each defective fragment in RH3d ovary librarywhen they are split into sense (left in red) and antisense (right in blue) regarding the *I-element* sequence.

**Supplemental Figure S7. Secondary piRNA biosynthesis enhancement after ancestor aging is specific to the *I-element*.**

**(A)** Lack of ping-pong signature in the progeny of young ancestors is only observed for *I-element* piRNAs. Heatmaps display ping-pong signatures for 20 TEs with dominant germline component (described in Malone et al. 2009) in ovaries from 3 day-old isogenic flies (RL3d -RH3d and SFL3d -SFH3d) that have young or aged ancestors. **(B)** Secondary piRNAs from TE defective copies are only accumulated for the *I-element* after ancestor aging.Scatter plot displays pairwise comparison of normalized amounts of “mismatched” piRNAs with ping-pong partners between RL3d and RH3d libraries for each germinal transposable element (“mismatched” piRNAs with ping-pong partners: secondary piRNAs that map to the TE consensus sequence with at least one mismatch). Table provides piRNA counts for each TE in both libraries.

**Supplemental Figure S8. Illustration of the specific increase of *I-element* piRNAs after ancestor aging.**

Shown is a fragment of piRNA cluster *88* located on *2RHet* arm that contains two defective *I-element* copies flanked by several defective copies of 3-4 other TEs (Supplemental Table S2). Density of genome-unique piRNAs is plotted for RL3d (white bars/ top) and RH3d (grey bars/ bottom) libraries (visualization using Integrated Genome Browser 6.7, Nicol et al. 2009).

**Supplemental Figure S9. Ancestor aging does not affect piRNA production by genomic loci flanking defective *I-element* fragments.**

Barplots display normalized level of genome-unique piRNAsmapping to each defective *I-element* fragment and normalized level of genome-unique piRNAsmapping to associated flanking 1 kb bininRL3d (white bars) and RH3d (grey bars) libraries (RH3d / RL3d fold changes in italic). Only genomic loci producing at least one piRNA per million total sequenced piRNAs in both RL3d and RH3d ovary libraries were considered. Annotation of flanking bins is supplied in Supplemental Table S2.

**SUPPLEMENTAL METHODS**

***Drosophila* biological model**

Using the Cha strain, we have reproduced what Bucheton did in 1978 on the *est28* strain. The Cha strain has been divided into two stocks:

- The “Low capacity to repress the *I-element*” (RL) stock in which the flies of each generation were collected from eggs laid by 1 to 4 day-old females. The flies of this stock were therefore continuously obtained from young parents.
- The “High capacity to repress the *I-element*” (RH) stock in which the flies of each generation were collected from eggs laid by 25 to 35 day-old females. The flies of this stock were therefore continuously obtained from aged parents.

**Small RNA sequencing**

The small RNA libraries (18-29nt) were prepared from (see asterisks in Figure 1A)

| **Library** | **Accession number** | **Technology** | **Sequencing facility** |
| --- | --- | --- | --- |
| 3 day-old RL ovaries | GSM850351 | HiSeq 2000 | Fasteris (Switzerland) |
| 3 day-old RH ovaries | GSM850352 | GA IIx | MGX (Montpellier, France) |
| 25 day-old RH ovaries | GSM850353 |
| 0-2h eggs laid by 25 day-old RH flies | GSM850354 |
| 3 day-old SFL ovaries | GSM850349 |
| 3 day-old SFH ovaries | GSM850350 |

**Small RNA purification**

200 to 300 ovaries from 2-3 day-old or 25 day-old yeast-fed flies were dissected in PBS/0.1% Tween and stocked at -80°C. 0-2 hours eggs laid by 2-3 day-old or 25 day-old yeast-fed flies were collected, dechorionated and stocked at -80°C. All of the following steps were carried out on ice or at 4 °C. Samples were crushed in 400 µL of binding buffer (20mM Hepes / KOH pH = 7.9, 10% glycerol, 0.2 mM EDTA, 1,5 mM MgCl2, 1 mM DTT, 0,2 mM PMSF, 100 mM potassium acetate), centrifuged at 10 000 g during 30 minutes, and supernatant was retrieved on ice. The small-RNA ribonucleoproteins were isolated as previously described (Lau et al. 2006; Lau et al. 2009).

Briefly, a 1 mL HitrapQ HP anion exchange column (GE Healthcare) was regenerated with 5 column volumes (CV) of elution buffer (same as binding buffer but with 1 M potassium acetate) and equilibrated with 7 CV of binding buffer on ÄKTA purifier FPLC system (GE Healthcare). 400 µL of total ovary clarified lysate were injected in the column, washed with 3 CV of binding buffer, and the flow through was collected in 1 mL fractions. The elution was performed using 6 CV of a mix containing 30 % of elution buffer in binding buffer and collected in 1 mL fractions. All of the fractions generated were pooled in 50 mL Falcon tube and deproteinized with 5 mL of acidic phenol / chlorophorm pH = 4.5 (Ambion). The aqueous phase was then re-extracted with 5 mL of chlorophorm (Normapur) to avoid phenol contamination. The nucleic acids were precipitated by adding 5 µL of 15 mg/mL dyed glycogen (Glycoblue, Ambion), 400 mM sodium acetate pH = 5.5 (Ambion) and 30 mL of absolute ethanol, and incubated over night at -80°C. The sample was transferred in Ultraclear centrifuge tube (Beckman) and centrifuged 4 hours at 20 000 g using swi 32 Ti rotor in Beckman optima XL 100 K ultracentrifuge. Supernatant was discarded and the pellet was resuspended in 50 µL DEPC water (MO Bio). Small RNAs were then purified on 15 % acrylamide, 8 M urea gel at 300 volts using TBE 1x as migration buffer. Radiolabeled RNA ladders (Decade markers, Ambion) were used to cut between 15 and 45 nucleotides. The strip of gel was crushed in 3 volumes of 500 mM NaCl (Ambion), incubated on a wheel over night at 4 °C, and acrylamide fragments were discarded using 0.45 µm Spin X filter (Corning). Small RNAs were recovered by precipitation with 1 µL of dyed Glycogen and 1 volume of isopropanol, then incubated overnight at -80°C. The tube was centrifuged at 20 000 g for 45 minutes. The pellet was resuspended in 10 µL DEPC water. Quality and quantity of small RNAs were checked on BioAnalyser profile (Agilent technologies) prior to library construction.

**Small RNA cloning**

Two RNA ladders (5’-CGUACGCGGUUUAAACGA-3’ and 5’-GUACGCGGAAUAGUGUUUAAACUAAUUGU-3’, IDT) were radiolabeled and 200 counts per second of both were added in each sample to flank the small RNAs of interest between 18 and 30 nucleotides for gel purification and to monitor the efficiency of the successive ligations. The ligated adaptators have been previously described (Ghildiyal et al 2008). 100 pmol of pre-adenylated 3’ adaptator (5’-rAppCTGTAGGCACCATCAAT/3ddC/-3’, IDT) were ligated using 400 U of T4 Rnl2 ligase (New England Biolabs) in 20µL of 50mM Tris HCL pH = 7.5, 10 mM MgCl2, 60 µg/mL BSA, 10 mM DTT, 10 % DMSO, 40 U RNAsin (Promega) during 3 hours at 25°C. Ligated constructs were then purified on 15 % acrylamide gel based on the length switch observed on radioactive ladders (between 37 and 49 nucleotides). After extraction from the gel and precipitation, the pellet of RNAs was resuspended in 12 µL of DEPC water. 100 pmol of 5’ adaptator (5’-GUUCAGAGUUCUACAGUCCGACGAUC-3’, Eurofins MWG) were ligated using 40 U of T4 RNA ligase (New England Biolabs) in 20 µL of 50 mM Tris HCL pH = 7.8, 10 mM MgCl2, 10 mM DTT, 1 mM ATP, 10 % DMSO and 40 U RNAsin during 1 hour at 37 °C. Cloned RNAs were purified in a 10 % acrylamide gel by cutting the strip between 63 and 75 nucleotides thanks to radiolabeled ladders, and precipitated. The RNA pellet was resuspended in 10 µL of DEPC water. Half of the sample was reverse transcribed using RT primer (5’-ATTGATGGTGCCTACAG-3’, Eurofins MWG) by SuperScript III reverse transcription kit (Invitrogen) and the other part of the sample was used as reverse transcription negative control. 2 µL of cDNA were then amplified using forward (5’-AATGATACGGCGACCACCGACAGGTTCAGAGTTCTACAGTCCGA-3’, Eurofins MWG) and reverse (5’-CAAGCAGAAGACGGCATAGCAATTGATGGTGCCTACAG-3’, Eurofins MWG) primers by a two step PCR procedure: initial denaturation at 95°C during 5 minutes, 5 cycles at low hybridization temperature (95°C – 15 sec, 50°C – 30 sec, 72°C – 20 sec), 10 cycles with an higher hybridization temperature (95°C – 15 sec, 60°C – 30 sec, 72°C – 20 sec) then final elongation at 72 °C for 3 minutes. PCR products were phenol/ chlorphorm extracted and precipitated. The pellet was resuspended in 10 µL of water and the ladders were digested using 20 U of Pme I restriction enzyme (New England Biolabs) in 50 mM potassium acetate, 20 mM tris acetate, 10 mM magnesium acetate, 1 mM DTT and 100 mg/mL BSA during 1 hour at 37 °C. The library was finally purified from strip cut between 107 to 119 nucleotides after an electrophoresis in a 4 % Metaphor agarose gel (Lonza). 2100 Bioanalyser profile was performed to validate the library construction and quantify the small RNA amounts prior to sequencing.

**Annotation and normalization of small RNA libraries**

Sequenced reads were stripped of the adapter in the 3’~~-~~end and the retrieved small RNA reads were mapped to the genome sequence of *Drosophila melanogaster* (release 5) according to sequencing quality using Novoalign (www.novocraft.com). Only reads perfectly matching the fly genome were analyzed (one mismatch was nevertheless allowed on low-sequencing quality nucleotides).

Libraries were then annotated according to reference databases containing ribosomal RNAs (rRNAs), transfer RNAs (tRNAs), micro RNAs (miRNAs), transcripts, small nuclear RNAs (snRNAs) and transposable element sequences. rRNAs, tRNAs and snRNAs were retrieved from modEncode (<http://www.modencode.org/> (Celniker et al. 2009)), miRNAs from miRBase (<http://www.mirbase.org/> (Kozomara and Griffiths-Jones 2011)), transcripts from Flybase (http://flybase.org/) and transposable elements from Repbase (<http://www.girinst.org/repbase/index.html> (Jurka et al. 2005) and from the UCSC repeatmasker track (<http://genome.ucsc.edu/>).

After subtracting reads matching abundant cellular species such as rRNAs, tRNAs and snRNAs, the remainders, called *bonafide* reads, were split into siRNAs (21nt), miRNAs (22nt) and piRNAs (23-29nt). For the piRNA identification, we selected *bonafide* reads strictly exceeding 22 nt in length and not annotated as miRNAs.

For transposable element (TE) analyses, piRNAs were mapped onto the Repbase collection of consensus sequence of TE with up to 4 mismatches. To prevent any ambiguous assignment, reads mapping to multiple TEs were not considered.

In order to control for sequencing depth and to perform differential analyses between libraries, small RNA counts were normalized to one million repeat-derived small RNAs (piRNAs) as previously published (Handler et al. 2011) (Fig.2, Supplemental Fig. S2). All calculations underlying histograms and plots were based on the normalized libraries.

Small RNA data from R, SF, RSF and I ovaries (Supplemental Fig. S3) were previously published (Brennecke et al. 2008) and are available *via* the NCBI gene expression omnibus (accession no. GSE13081, datasets GSM327621, GSM327631, GSM327630 and GSM327620 respectively).

**Comparison of library normalization**

Four small RNA classes were used to normalize small RNA counts: *bonafide* reads, piRNAs, miRNAs and non TE-derived siRNAs (21 nt-reads that map to the hairpins of structured loci and the 3’UTR of other loci (Czech et al. 2008; Ghildiyal et al. 2008; Kawamura et al. 2008; Okamura et al. 2008)).

**Analysis of *I-element* piRNAs**

The *I-element* sequence used as consensus is the sequence of functional *I-element* cloned and sequenced by Bucheton (Bucheton et al. 1984). Genomic positions of all annotated *I-element* copies in the sequenced *Drosophila* genome were extracted from the UCSC repeatmasker track. These copies split into two groups: around ten copies exhibit no or very few mismatches to the *I-element* consensus sequence and correspond to recent full length insertions of the functional *I-element* in the inducer sequenced genome. Other fragments exhibit at least 5% divergence and correspond to defective *I-elements*. To retrieve piRNAs derived from *I-element* in libraries we performed two-steps assignment: first, piRNAs were mapped to all annotated *I-element* copies. Read counts of piRNAs mapping to multiple copies were weighted by their mapping number. The retrieved piRNAs were then extracted and mapped onto the *I-element* consensus sequence allowing up to 4 mismatches.

For the piRNA density plots, piRNAs were collapsed to their 5’ end and plotted along the functional *I-element* sequence.

**Ping-pong signature and identification of ping-pong partners**

The ping-pong signature aims to determine the likelihood that a piRNA has a complementary partner with a 5’ 10nt overlap as previously described by Brennecke et al. in 2008. Each annotated *I-element* piRNA was reduced to its 5’end. For each piRNA, that we can call “target”, we determined how many annotated *I-element* piRNAs, called “partner”, matched the opposite strand in a distance from 0nt to 24nt (imperfect overlap between “target” and “partner” from 1nt to 25nt). For each “target” piRNA, the histogram of “partners” was then normalized to 100 % over all “partners”. We then combined all these histograms (one histogram per annotated *I-element* piRNA), weighting each “target” histogram’s contribution by the abundance of its “target” piRNA.

Ping-pong partners were defined as piRNAs which have at least one “partner” piRNA matching the opposite strand in a distance of 9 nt (imperfect overlap of 10 nt between ping-pong partners).

**Western blotting**

30 ovaries from RL3d and RH3d flies were dissected into PBST (10mM Na2HPO4, 176 mM KH2PO4 pH 7.4, 2.7 mM KCl, 137 mM NaCl, 0.1% Tween-20) and crushed in 200 µL of lysis buffer (20mM Hepes / KOH pH = 7,9, 100 mm potassium acetate, 10% Glycerol, 0,2 mM EDTA, 1,5 mM MgCl2, 1 mM DTT, 0,2 mM PMSF). The lysate was centrifuged for 30 min at 10 000 g at 4°C, and the supernatant was quantified using Bradford protein assay (Biorad) and frozen in aliquots stored at −20°C. 200 μg of total ovarian protein lysate were mixed with an equal volume of 100 mM Tris-Cl, pH 6.8, 4% SDS, 40mM β-mercaptoethanol, 20% glycerol, and 0.2% bromophenol blue, boiled for 10 min, and then resolved by 8% polyacrylamide/SDS gel electrophoresis. Proteins were then transferred on methanol activated PVDF membrane (Immobilon-P, Millipore), then blocked in PBST-milk (PBST, 5% *mw* non-fat dry milk) at room temperature for one hour. After blocking, the membrane was incubated overnight at 4°C in PBST-milk containing primary antibody. Next, the membrane was washed three times with PBST at room temperature for 10 min and incubated 1 hour at room temperature with either goat anti-mouse IgG-HRP (Thermo-Scientific) or goat anti-rabbit IgG-HRP (Pierce) at 1:5,000 in PBST-milk. Then the membrane was washed three times for 10 min with PBST at room temperature and developed with ECL SuperSignal West Femto Maximum Sensitivity Substrate (Thermo-Scientific). Images were fixed on Hyperfilm ECL (Amersham). Chemiluminescence was captured in Chemi smart 5000 using Chemi-Capt V12.8 software (Vilber Lourmat). Signal quantification was performed on 3 biological replicates for each sample and normalised to a-Tubulin signal, using BioProfil Bio 1-D V11.9 software (Vilber Lourmat).

**Antibodies**

The antibodies used for western blotting were mouse anti-Aub (1:1500, kind gift from Dr Siomi), rabbit anti-Piwi and anti-Ago3 (1:1000, kind gift from Dr Brennecke) and mouse anti-a-Tubulin (1:500, kind gift from Dr Rogowski).

**Primers**

The primers used for *CL1A* and *CL1B* regions were described in Klattenhoff et al. 2009, for *light* in Dramard et al. 2007 and for *1360*-*element* in Brower-Toland et al. 2007. The primer pairs that amplified the *I1667-1*, *I1667-2*, *2RHet* and *U* regions were designed so that one primer hybridizes in the *I-element* defective sequence and the other one in its flanking genomic region.

|  | **Sequence** | **Genomic coordinates** |
| --- | --- | --- |
| ***rp49*_for** | GACAATCTCCTTGCGCTTCT | 3R:25,871,107-25,871,252 |
| ***rp49*_rev** | ATCGGTTACGGATCGAACAA |
| ***vasa*_for** | CAGTGGCTTCTCGTGGATTAG | 2L:15,073,682-15,073,834 |
| ***vasa*_rev** | CACGACCTGTACGTCCAATG |
| ***I1667-1*_for** | AATAGACCAAACAATCAAACTTAGCCT | 2R:2,154,528-2,154,821 |
| ***I1667-1*_rev** | CAGTCGCCTCTAAAGTGTATGT |
| ***I1667-2*_for** | GACTACGGTGCCTACAGCTATG | 2R:2,156,515-2,156,682 |
| ***I1667-2*_rev** | GCACTCGTGTTTACCCAGAATG |
| ***2RHet*_for** | CGATTCACTGTCGCTGTTGT | 2RHet:1,691,548-1,691,668 |
| ***2RHet*_rev** | AATCTCTTCCCAGGCATTTT |
| ***U*_for** | GGTTAGCGGCATTGTTGTTT | U:1,233,675-1,233,836 |
| ***U*_rev** | TTCGAAAGAGTTGTTGTCTTTCC |
| ***Adh*_for** | GGTCCCGGTGGTATCATC | 2L: 14,616,791- 14,617,067 |
| ***Adh*_rev** | CAACCTGAGGCTCAACATCC |

**SUPPLEMENTAL REFERENCES**

Brower-Toland B, Findley SD, Jiang L, Liu L, Yin H, Dus M, Zhou P, Elgin SC, Lin H. 2007. Drosophila PIWI associates with chromatin and interacts directly with HP1a. *Genes Dev* **21**(18): 2300-2311.

Celniker SE, Dillon LA, Gerstein MB, Gunsalus KC, Henikoff S, Karpen GH, Kellis M, Lai EC, Lieb JD, MacAlpine DM et al. 2009. Unlocking the secrets of the genome. *Nature* **459**(7249): 927-930.

Czech B, Malone CD, Zhou R, Stark A, Schlingeheyde C, Dus M, Perrimon N, Kellis M, Wohlschlegel JA, Sachidanandam R et al. 2008. An endogenous small interfering RNA pathway in Drosophila. *Nature* **453**(7196): 798-802.

Dramard X, Heidmann T, Jensen S. 2007. Natural epigenetic protection against the I-factor, a Drosophila LINE retrotransposon, by remnants of ancestral invasions. *PLoS One* **2**(3): e304.

Ghildiyal M, Seitz H, Horwich MD, Li C, Du T, Lee S, Xu J, Kittler EL, Zapp ML, Weng Z et al. 2008. Endogenous siRNAs derived from transposons and mRNAs in Drosophila somatic cells. *Science* **320**(5879): 1077-1081.

Jurka J, Kapitonov VV, Pavlicek A, Klonowski P, Kohany O, Walichiewicz J. 2005. Repbase Update, a database of eukaryotic repetitive elements. *Cytogenet Genome Res* **110**(1-4): 462-467.

Kawamura Y, Saito K, Kin T, Ono Y, Asai K, Sunohara T, Okada TN, Siomi MC, Siomi H. 2008. Drosophila endogenous small RNAs bind to Argonaute 2 in somatic cells. *Nature* **453**(7196): 793-797.

Kozomara A, Griffiths-Jones S. 2011. miRBase: integrating microRNA annotation and deep-sequencing data. *Nucleic Acids Res* **39**(Database issue): D152-157.

Lau NC, Seto AG, Kim J, Kuramochi-Miyagawa S, Nakano T, Bartel DP, Kingston RE. 2006. Characterization of the piRNA complex from rat testes. *Science* **313**(5785): 363-367.

Nicol JW, Helt GA, Blanchard SG, Jr., Raja A, Loraine AE. 2009. The Integrated Genome Browser: free software for distribution and exploration of genome-scale datasets. *Bioinformatics* **25**(20): 2730-2731.

Okamura K, Chung WJ, Ruby JG, Guo H, Bartel DP, Lai EC. 2008. The Drosophila hairpin RNA pathway generates endogenous short interfering RNAs. *Nature* **453**(7196): 803-806.
